# Supplementary material
Source: Springer Nature journal article supplement (https://www.springermedizin.de/resource/supplementary/12937_2011_427_MOESM2_ESM.pdf/25653086)

**a)**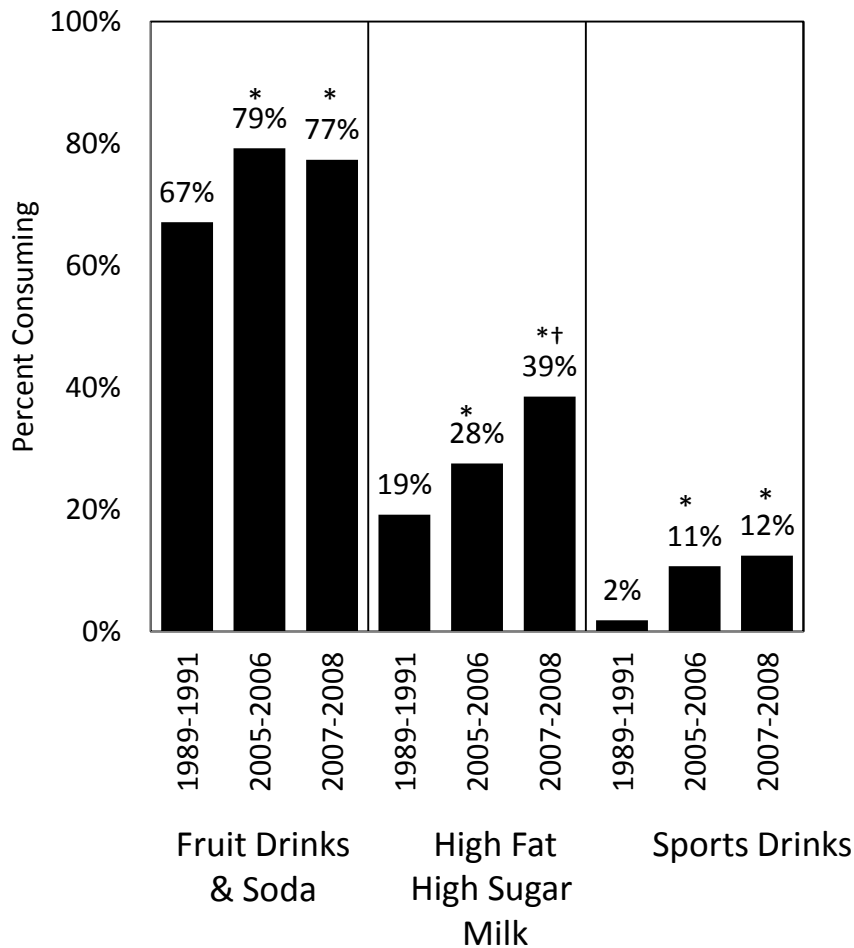**b)**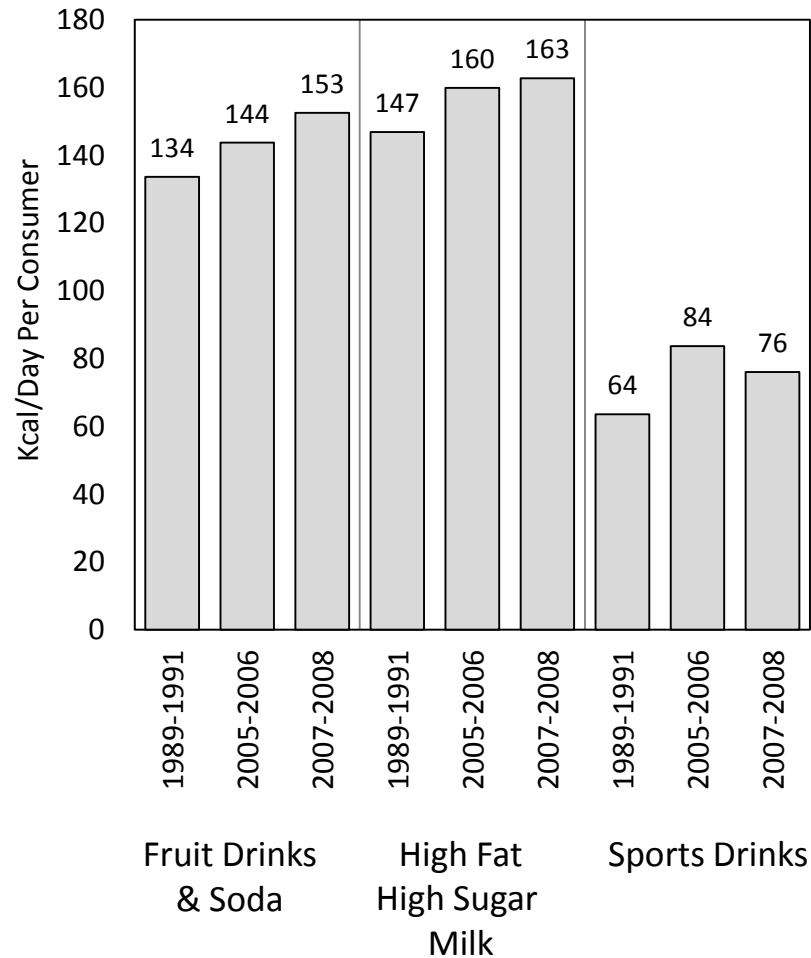

Supplement: MOESM2 [file 25653086]
